# Supplementary material
Source: MDPI journal article supplement (https://www.mdpi.com/2227-7102/14/5/506)
Supplement: s1 [file s1]

Archive with 4 entries (4 files):
- SampleMathPacket.pdf
- __MACOSX/._SampleMathPacket.pdf
- SampleSciencePacket.pdf
- __MACOSX/._SampleSciencePacket.pdf
